# Supplementary material
Source: publisher figshare collection journal article supplement (https://frontiersin.figshare.com/ndownloader/files/12431558)
Supplement: Supplementary file 1 [file 12431558]

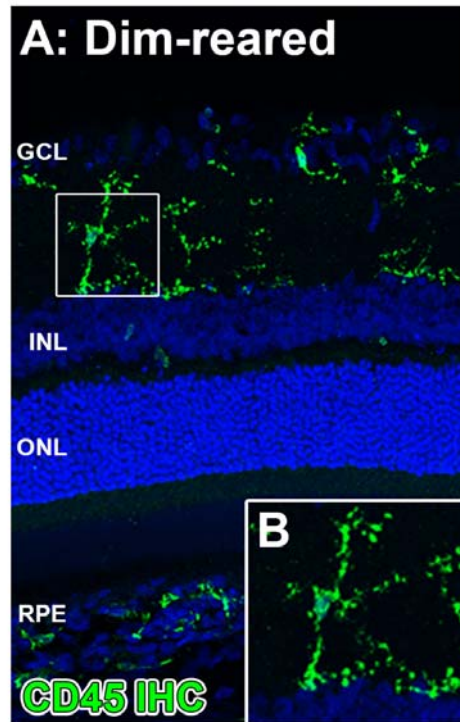

**Supplementary Figure S1.** Representative labelling of CD45+ cells (green) by immunohistochemistry on dim-reared retinal sections, with DAPI (blue) as the background stain. **A-B:** In dim-reared controls, staining for CD45 was restricted to ramified microglia in the inner plexiform layer IPL (A,C). All datasets represent a sample size of n=4 per group. C, choroid; INL, inner nuclear layer; ONL, outer nuclear layer; OS, outer segments; RPE, retinal pigment epithelium.
